# Supplementary material for: Functionality and Acceptance of the EsoCap System—A Novel Film-Based Drug Delivery Technology: Results of an In Vivo Study
Source: MDPI journal article supplement (doi:10.3390/pharmaceutics13060828), 2021-06-02
Supplement: s1 [file s1]

# Fragebogen

## In vivo Evaluierung eines neuen Systems zur Platzierung von Polymerfilmen im Ösophagus

Datum:

Versuchsnummer:

Proband:

Wie gut ließ sich die Arzneiform schlucken?

|                                                                                    |                      |
|------------------------------------------------------------------------------------|----------------------|
| Kein Unterschied zu reiner Flüssigkeit                                             | Gar nicht schluckbar |
|  |                      |

Wie ausreichend empfanden sie die Wassermenge bei Einnahme?

|                                                                                    |               |         |
|------------------------------------------------------------------------------------|---------------|---------|
| zu wenig                                                                           | genau richtig | zu viel |
|  |               |         |

Hatten Sie während der Applikation ein Fremdkörpergefühl im Rachenhalsbereich?

|                                                                                      |                                              |
|--------------------------------------------------------------------------------------|----------------------------------------------|
| Kein Fremdkörpergefühl                                                               | Am stärksten vorstellbares Fremdkörpergefühl |
|  |                                              |

Hatten Sie nach der Applikation ein Fremdkörpergefühl im Rachenhalsbereich?

|                                                                                      |                                              |
|--------------------------------------------------------------------------------------|----------------------------------------------|
| Kein Fremdkörpergefühl                                                               | Am stärksten vorstellbares Fremdkörpergefühl |
|  |                                              |

Hatten Sie nach der Einnahme Schmerzen im Rachenhalsbereich?

|                                                                                      |                                     |
|--------------------------------------------------------------------------------------|-------------------------------------|
| Keine Schmerzen                                                                      | Am stärksten vorstellbare Schmerzen |
|  |                                     |

Hatten Sie nach der Einnahme einen Würgereiz?

|                                                                                      |           |
|--------------------------------------------------------------------------------------|-----------|
| Kein Würgereiz                                                                       | Erbrechen |
|  |           |

Wurde abschließend Wasser nachgetrunken?

☐ Nein

☐ Ja: \_\_\_\_\_ mL

Kommentare:
